# Supplementary material for: Ernährung in der Palliativmedizin
Source: Springer Nature journal article supplement (doi:10.1007/s00058-023-3055-6), 2023-04-01
Supplement: MOESM1 [file 25200488]

## Literatur

### zum Beitrag „Ernährung in der Palliativmedizin“

von Andrea Schneider

*Heilberufe (75) 4/2023, S. 26-29*

1. Arends J, Baracos V (2017) ESPEN expert group recommendations for action against cancer-related malnutrition. *Clin Nutr* 36:1187–1196
2. Dewys WD, Begg C (1980) Prognostic effect of weight loss prior to chemotherapy in cancer patients. Eastern cooperative oncology group. *Am J Med* 69(4):491–497
3. Druml C, Ballmer PE (2016) ESPEN guideline on ethical aspects of artificial nutrition and hydration. *Clin Nutr* 35:545–556
4. Cotogni P, Stragliotto S (2021) The role of nutritional support for cancer patients in palliative care. *Nutrients* 13:306
5. Ruggeri E, Giannantonio M (2020) Home artificial nutrition in palliative care cancer patients: Impact on survival and performance status. *Clin Nutr* 39:3346–3353
6. Bischoff SC, Austin P (2021) ESPEN practical guideline: home enteral nutrition. *Clin Nutr* 41:468–488
7. Pironi L, Boeykens K (2020) ESPEN guideline on home parenteral nutrition. *Clin Nutr* 39:1645–1666
8. American Geriatrics Society Ethics Committee and Clinical Practice and Models of Care Committee (2014) American geriatrics society feeding tubes in advanced dementia position statement. *J Am Geriatr Soc* 62:1590–1593
9. Müller M (2020) *Aktuel Ernährungsmed* 45:356–362
