# Supplementary material for: Ernährung in der Palliativmedizin
Source: Springer Nature journal article supplement (doi:10.1007/s00058-023-3055-6), 2023-04-01
Supplement: MOESM2 [file 25200488]

# Abbildungen und Tabelle

zum Beitrag „Ernährung in der Palliativmedizin“  
von Andrea Schneider

Heilberufe (75) 4/2023, S. 26-29

**Abb. 1** Anorexie-Kachexie-Syndrom

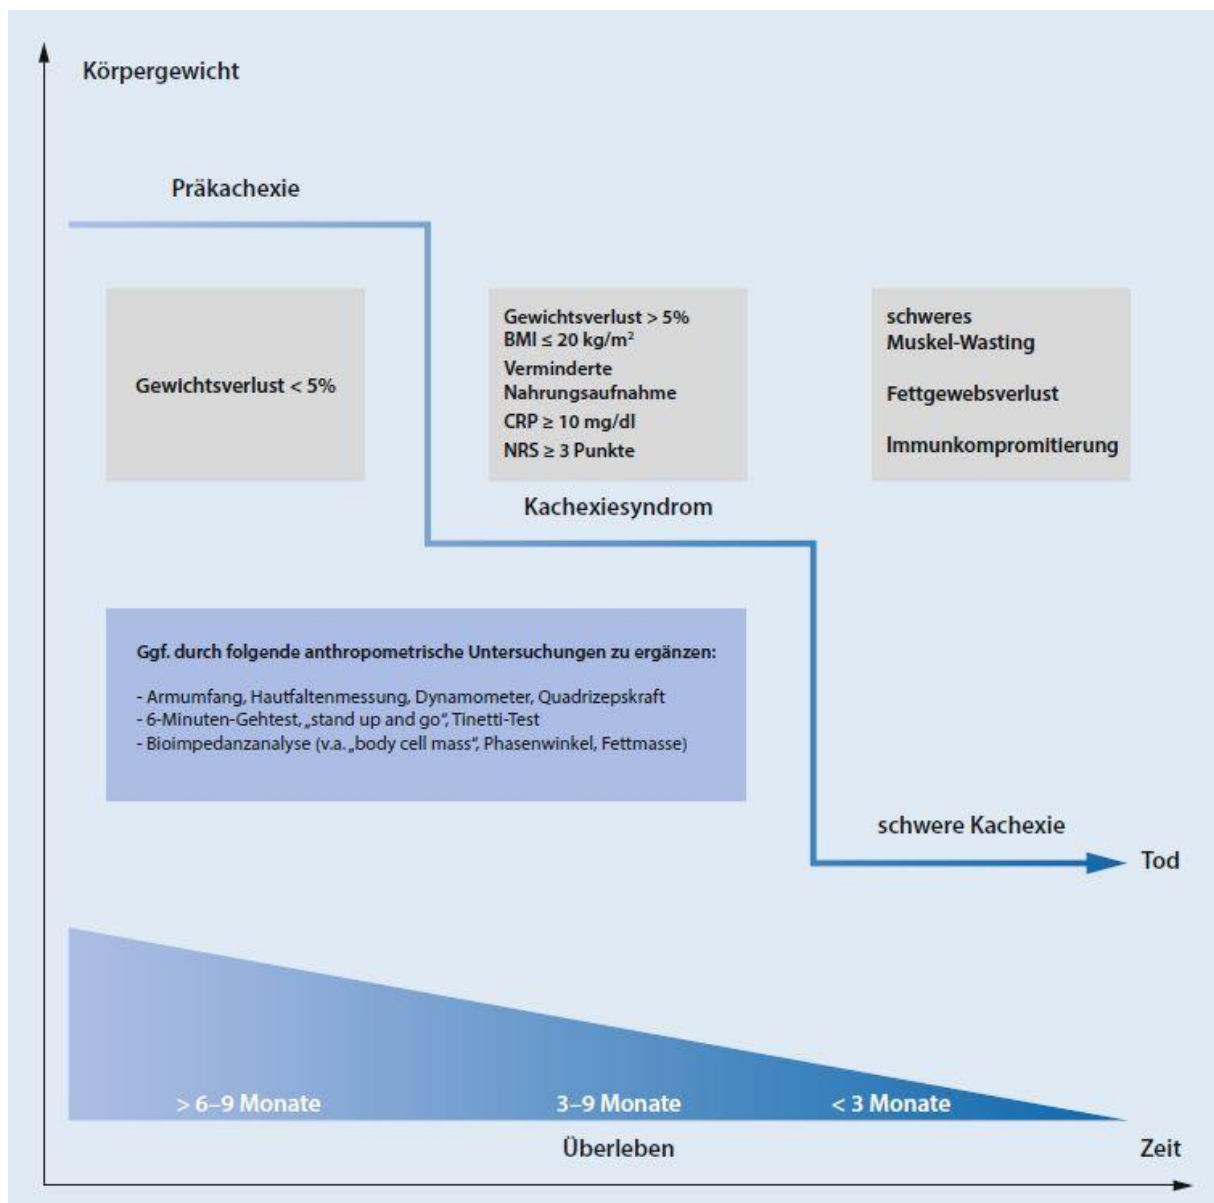

**Abb. 2** Ernährungstherapie im interdisziplinären Team

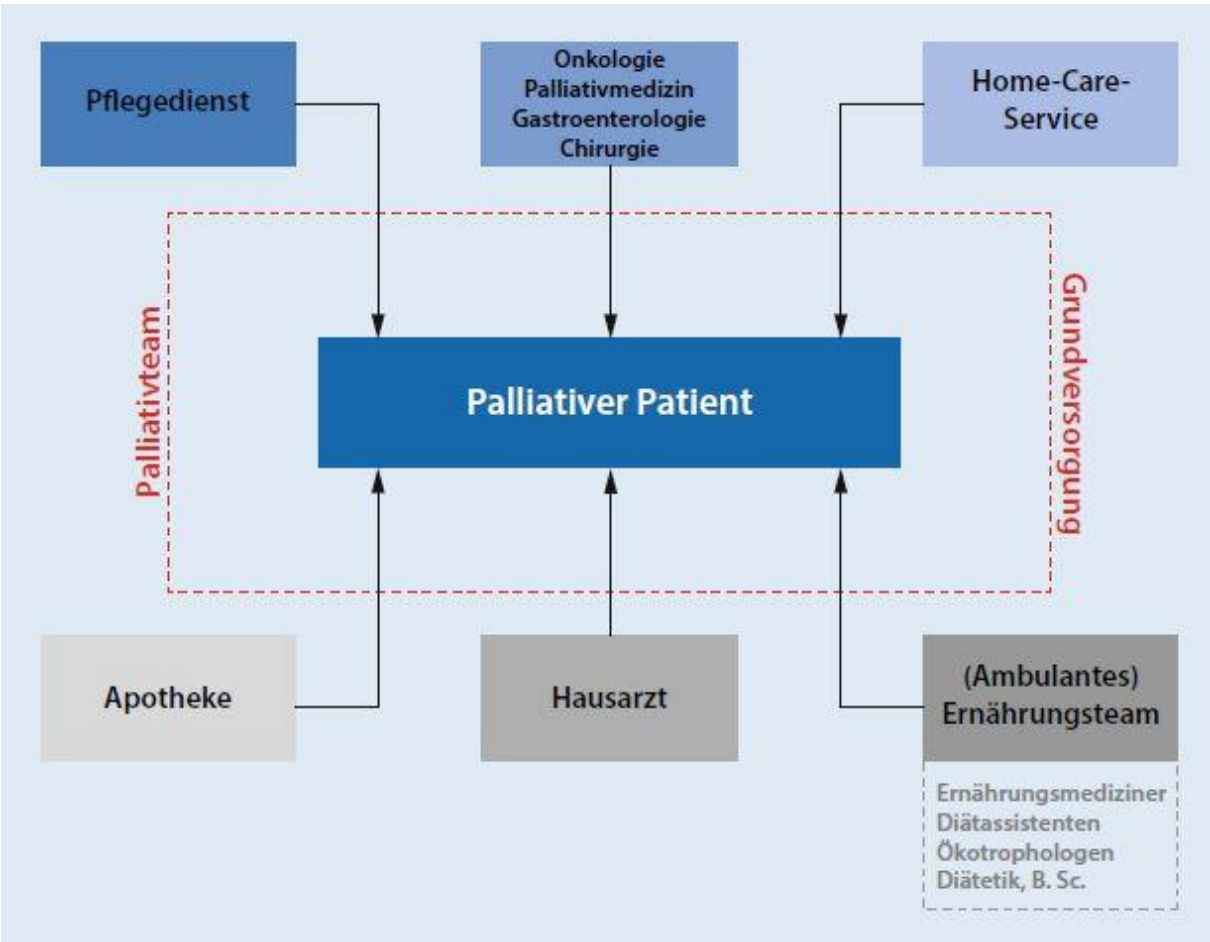

**Abb. 3** Stufenschema für die Ernährungstherapie (modifiziert nach Müller)

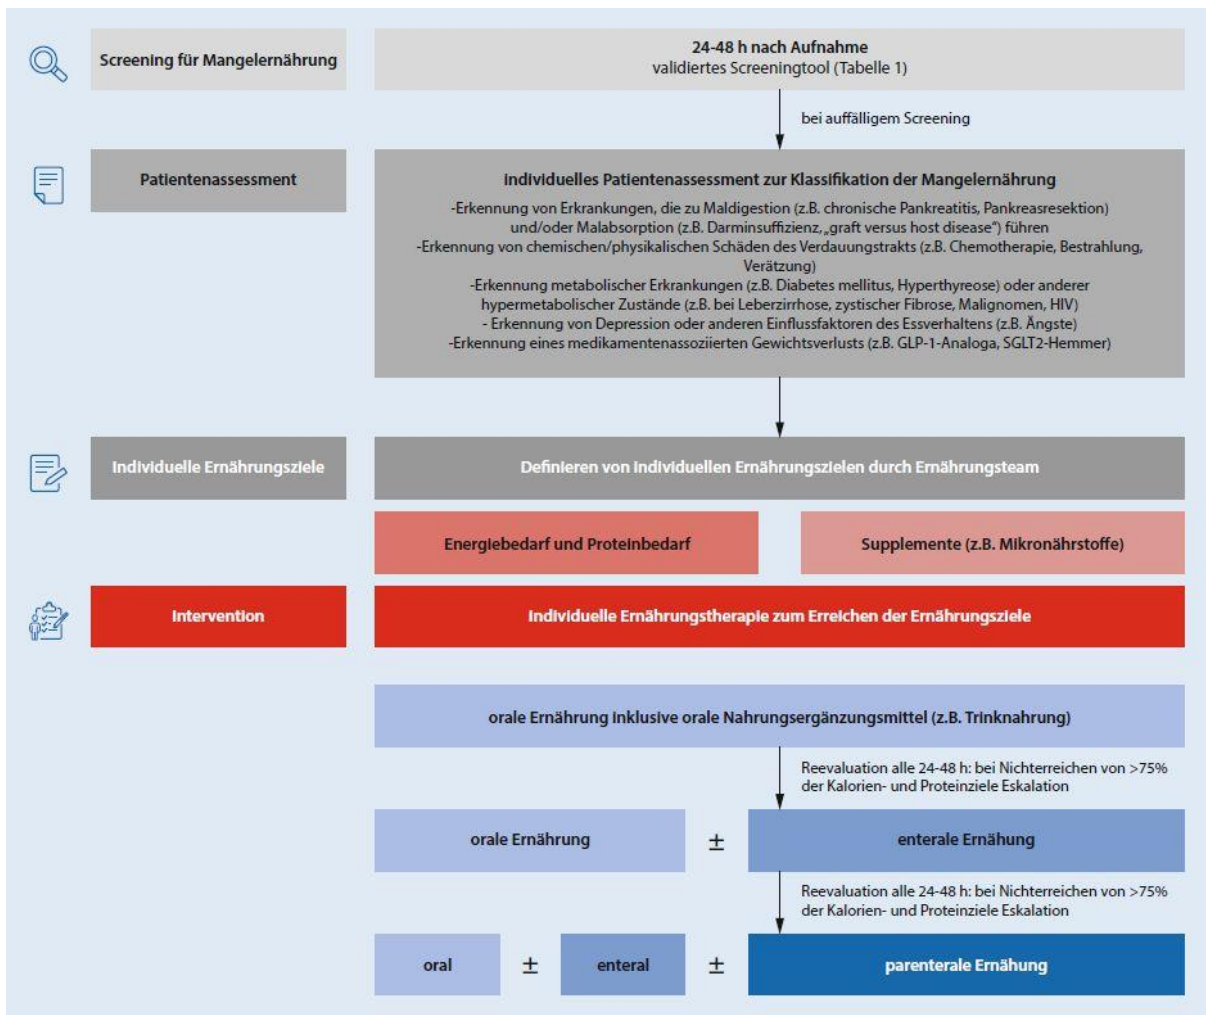

**Tab. 1** Screeninginstrumente bei Mangelernährung

| Instrument                                      | Parameter                                                                                            | Zielsetzung                                                                                                     | Anwendungsbereich                            |
|-------------------------------------------------|------------------------------------------------------------------------------------------------------|-----------------------------------------------------------------------------------------------------------------|----------------------------------------------|
| Nutritional Risk Screening – 2002 (NRS-2002)    | Vorscreening: 4 Items<br>Hauptscreening: 3 Items                                                     | Identifikation von Patienten mit Mangelernährung oder hohem Ernährungsrisiko                                    | Anwendung v. a. für Patienten im Krankenhaus |
| Mini Nutritional Assessment Short Form (MNA-SF) | 6 Items                                                                                              | Frühe Identifikation von älteren Patienten mit Risiko für Mangelernährung in Pflegeeinrichtung oder Krankenhaus | Anwendung v. a. für geriatrische Patienten   |
| Subjective Global Assessment                    | 12 Items (inklusive körperliche Untersuchung)                                                        | Aufgrund seines Umfangs häufig als Referenztool eingesetzt                                                      | Anwendung bei Patienten im Krankenhaus       |
| Malnutrition Universal Screening Tool (MUST)    | 3 Parameter:<br>Body-Mass-Index (ungewollter) Gewichtsverlust<br>Akute Erkrankung/<br>Nahrungskarenz | Identifikation von ambulanten Patienten mit Mangelernährung                                                     | Anwendung im ambulanten Bereich              |
